# Supplementary material for: Distribution of pesticides in agricultural and urban soils of Brazil: a critical review
Source: Royal Society of Chemistry journal article supplement (doi:10.1039/c9em00433e), 2020-01-01
Supplement: c9em00433e1.pdf [file c9em00433e1.pdf]

**Table A1.** Description of the analytical method used in the papers

| <b>Pesticide name</b>               | <b>LOQ</b>                            | <b>LOD</b>                                           | <b>Analytical method used</b> | <b>Reference</b>                                                              |
|-------------------------------------|---------------------------------------|------------------------------------------------------|-------------------------------|-------------------------------------------------------------------------------|
| Trifluralin                         | NA                                    | 0.04µg mL <sup>-1</sup><br><0,01 mg / kg para        | HPLC/UV                       | Lima et al., 2010                                                             |
|                                     | NA                                    | DPI                                                  | GC/ECD                        | Rissato et al., 2005                                                          |
|                                     | 0.8 µg kg <sup>-1</sup><br>0.08 mg/kg | 0.25µg kg <sup>-1</sup><br>0.06 mg/kg                | HRGC/TSD                      | Soares et al., 2015<br>Polese et al., 2002                                    |
| 1,2,4-TCB                           | NA                                    | 0.01µg / kg                                          | Método semi-quantitativo      | Asmus et al., 2008                                                            |
| Alachlor                            | 4.13 mg L <sup>-1</sup>               | 0.20 mg L <sup>-1</sup>                              | GC/ECD                        | Quinete et al., 2011<br>Pinheiro, Moraes e Silva, 2011<br>Soares et al., 2015 |
|                                     | NA<br>0.27 µg kg <sup>-1</sup>        | NA<br>0.09 µg kg <sup>-1</sup>                       |                               |                                                                               |
| Quizafop                            | NA                                    | <0,01 mg / kg para<br>DPI                            |                               | Rissato et al., 2005                                                          |
| Diclofop - Methyl                   | NA                                    | <0,01 mg / kg para<br>DPI                            |                               | Rissato et al., 2005                                                          |
| Metolachlor                         | 7.7 mg L <sup>-1</sup>                | 0.01 mg L <sup>-1</sup><br><0,01 mg / kg para<br>DPI |                               | Quinete et al., 2011<br>Rissato et al., 2005                                  |
|                                     | 0.08 mg/kg                            | 0.01 mg/kg                                           |                               | Polese et al., 2002                                                           |
| Linuron                             |                                       | <0,01 mg / kg para<br>DPI                            |                               | Rissato et al., 2005                                                          |
| Diuron                              | 0.05 mg/kg                            | 0.02 mg/kg                                           |                               | Felicio et al., 2016<br>Pinheiro, Moraes e Silva, 2011                        |
|                                     | NA                                    | NA                                                   |                               |                                                                               |
| 3,4-dichlorophenylurea              | 0.03 mg/kg                            | 0.01 mg/kg                                           |                               | Felicio et al., 2016                                                          |
| 3-(3,4-dichlorophenyl)-1-methylurea | 0.05 mg/kg                            | 0.02 mg/kg                                           |                               | Felicio et al., 2016                                                          |

|                         |                         |                         |                        |                                                       |
|-------------------------|-------------------------|-------------------------|------------------------|-------------------------------------------------------|
| 3,4-dichloroaniline     | 0.07 mg/kg              | 0.02 mg/kg              |                        | Felício et al., 2016                                  |
| 2,4-D                   | NA                      | NA                      |                        | Pinheiro, Moraes e Silva, 2011                        |
| Atrazine                | NA<br>0.08 mg/kg        | NA<br>0.02 mg/kg        |                        | Pinheiro, Moraes e Silva, 2011<br>Polese et al., 2002 |
| Deisopropylatrazine     | 0.08 mg/kg              | 0.03 mg/kg              |                        | Polese et al., 2002                                   |
| Desethylatrazine        | 0.08 mg/kg              | 0.02 mg/kg              |                        | Polese et al., 2002                                   |
| Simazine                | 0.08 mg/kg              | 0.02 mg/kg              |                        | Polese et al., 2002                                   |
| Metribuzine             | 0.08 mg/kg              | 0.04 mg/kg              |                        | Polese et al., 2002                                   |
| Imazamox                | 5.0 µg/kg               | 1.5 µg/kg               |                        | Kemmerich et al., 2015                                |
| Imazapic                | 5.0 µg/kg               | 1.5 µg/kg               |                        | Kemmerich et al., 2015                                |
| Imazapyr                | 5.0 µg/kg               | 1.5 µg/kg               |                        | Kemmerich et al., 2015                                |
| Imazaquin               | 5.0 µg/kg               | 1.5 µg/kg               |                        | Kemmerich et al., 2015                                |
| Imazethaphyr            | 5.0 µg/kg               | 1.5 µg/kg               |                        | Kemmerich et al., 2015                                |
| ΣDDT                    | NA                      | 0.01 ppb.               |                        | Torres, 2002                                          |
|                         | NA                      | 0.01 ppb.               |                        | Torres, 2002                                          |
|                         | Na                      | NA                      | GC/ECD                 | Brilhante e Franco , 2006                             |
|                         | 0.1 µg/L                | 3. Ruído                |                        | Rissato et al., 2004                                  |
|                         | NA                      | NA                      |                        | Torres et al., 2009                                   |
|                         | NA                      | NA                      |                        | Vieira, torres e Malm, 2001                           |
| 2,4' - DDT              | 0.01 µg g <sup>-1</sup> | 3. Ruído                |                        | Rodrigues,et al., 2017                                |
|                         | NA                      | 0.01 ppb.               |                        | Torres, 2002                                          |
|                         | NA                      | 0.01 ppb.               |                        | Torres, 2002                                          |
|                         | NA                      | 0.01µg / kg             |                        | Asmus et al., 2008                                    |
|                         | 3.3 mg L <sup>-1</sup>  | 0.01 mg L <sup>-1</sup> |                        | Quinete et al., 2011                                  |
|                         | 0.01 ng/g -1            | 0.002 ng/g -1           | GC/MS                  | Rissato et al., 2006                                  |
| 0.01 µg g <sup>-1</sup> | 3. Ruído                |                         | Rodrigues,et al., 2017 |                                                       |

|                           |                           |                         |                                            |
|---------------------------|---------------------------|-------------------------|--------------------------------------------|
| 4,4' - DDT                | NA                        | 0.01 ppb.               | Torres, 2002                               |
|                           | NA                        | 0.01 ppb.               | Torres, 2002                               |
|                           | NA                        | 0.01 µg / kg            | Asmus et al., 2008                         |
|                           | 3.13 mg L -<br>1          | 0.02 mg L -1            | Quinete et al., 2011                       |
|                           | 0.01 ng/g -<br>1          | 0.002 ng/g -1           | Rissato et al., 2006                       |
|                           | 1.8 µg kg-                | 0.59 µg kg-             | Soares et al., 2015                        |
|                           | NA                        | 0.0057 mg/kg            | Villa et al., 2006                         |
|                           | 0.01 µg g -1              | 3. Ruído                | Rodrigues, et al., 2017                    |
|                           | DDT (2.4' DDT + 4.4' DDT) | NA                      | 2.4' DDT 1.74 µg/kg<br>4.4' DDT 0.21 µg/kg |
| 4.4' DDE                  | NA                        | 0.01 ppb.               | Torres, 2002                               |
|                           | NA                        | 0.01 ppb.               | Torres, 2002                               |
|                           | NA                        | 0.01 µg / kg            | Asmus et al., 2008                         |
|                           | 0.01 ng/g -<br>1          | 0.002 ng/g -1           | Rissato et al., 2006                       |
|                           | 3.09mg L -<br>1           | 0.02 mg L -1            | Quinete et al., 2011                       |
|                           | NA                        | 0.0045 mg/kg            | Villa et al., 2006                         |
|                           | 0.01 µg g -1              | 3. Ruído                | Rodrigues, et al., 2017                    |
|                           | 2,4'-DDE                  | NA                      | 0.01 ppb.                                  |
| DDE (2.4' DDE + 2.2' DDE) | NA                        | 0.01 ppb.               | Torres, 2002                               |
|                           | NA                        | 0.01 µg / kg            | Asmus et al., 2008                         |
|                           | 1,56 mg L -<br>1          | 0.01 mg L -1            | Quinete et al., 2011                       |
|                           | 0.01 µg g -1              | 3. Ruído                | Rodrigues, et al., 2017                    |
|                           | NA                        | 0.01 ppb.               | Torres, 2002                               |
|                           | NA                        | 0.01 ppb.               | Torres, 2002                               |
|                           | NA                        | 0.01 µg / kg            | Asmus et al., 2008                         |
|                           | 1,56 mg L -<br>1          | 0.01 mg L -1            | Quinete et al., 2011                       |
| 0.01 µg g -1              | 3. Ruído                  | Rodrigues, et al., 2017 |                                            |
| 4,4' - DDD                | NA                        | 0.01 ppb.               | Torres, 2002                               |
|                           | NA                        | 0.01 ppb.               | Torres, 2002                               |
|                           | NA                        | 0.01 µg / kg            | Asmus et al., 2008                         |
|                           | 3,4 mg L -1               | 0.02 mg L -1            | Quinete et al., 2011                       |
|                           | 0.01 ng/g -<br>1          | 0.002 ng/g -1           | Rissato et al., 2006                       |
|                           | NA                        | 0.21 µg/kg              | Vieira, torres e Malm, 2001                |
|                           | 0.01 µg g -1              | 3. Ruído                | Rodrigues, et al., 2017                    |
|                           | DDE (2.4' DDE + 2.2' DDE) | NA                      | 2.4' DDE 0.71 µg/kg<br>2.2' DDE 1.79 µg/kg |

|                      |                         |                           |                        |
|----------------------|-------------------------|---------------------------|------------------------|
| 2,4' DDD             | NA                      | 0.01µg / kg               | Asmus et al., 2008     |
|                      | 2.2 mg L <sup>-1</sup>  | 0.01 mg L <sup>-1</sup>   | Quinete et al., 2011   |
|                      | 0.01 µg g <sup>-1</sup> | 3. Ruído                  | Rodrigues,et al., 2017 |
| Heptachlor           | 2 mg L <sup>-1</sup>    | 0.02 mg L <sup>-1</sup>   | Quinete et al., 2011   |
|                      | 0.05 ng/g <sup>-1</sup> | 0.003 ng/g <sup>-1</sup>  | Rissato et al., 2006   |
|                      | 0.1 µg/L                | 3. Ruído                  | Rissato et al., 2004   |
| Heptachlor - epoxide | 0.03 ng/g <sup>-1</sup> | 0.005 ng/g <sup>-1</sup>  | Rissato et al., 2006   |
| Metoxichlor          | 0.10 ng/g <sup>-1</sup> | 0.003 ng/g <sup>-1</sup>  | Rissato et al., 2006   |
|                      | NA                      | <0,01 mg / kg para<br>DPI | Rissato et al., 2005   |
| Alpha - endosulfan I | 3.06 mg L <sup>-1</sup> |                           |                        |
|                      | 1                       | 0.03 mg L <sup>-1</sup>   | Quinete et al., 2011   |
|                      | 0.05 ng/g <sup>-1</sup> | 0.001 ng/g <sup>-1</sup>  | Rissato et al., 2006   |
|                      | NA                      | <0,01 mg / kg para<br>DPI | Rissato et al., 2005   |
| Beta - endosulfan    | 0.1 µg/L                | 3. Ruído                  | Rissato et al., 2004   |
|                      | 5.39 mg L <sup>-1</sup> |                           |                        |
|                      | 1                       | 0.03 mg L <sup>-1</sup>   | Quinete et al., 2011   |
|                      | 0.05 ng/g <sup>-1</sup> | 0.001 ng/g <sup>-1</sup>  | Rissato et al., 2006   |
| Endosulfan Sulfatado | NA                      | <0,01 mg / kg para<br>DPI | Rissato et al., 2005   |
|                      | 0.01 ng/g <sup>-1</sup> | 0.001 ng/g <sup>-1</sup>  | Rissato et al., 2006   |
| Aldrin               | 3.94 mg L <sup>-1</sup> |                           |                        |
|                      | 1                       | 0.01 mg L <sup>-1</sup>   | Quinete et al., 2011   |
|                      | 0.04 ng/g <sup>-1</sup> | 0.001 ng/g <sup>-1</sup>  | Rissato et al., 2006   |
|                      | 0.04 mg/kg              | <0,01 mg / kg para<br>DPI | Rissato et al., 2005   |
| Dieldrin             | 0.1 µg/L                | 3. Ruído                  | Rissato et al., 2004   |
|                      | 4.86 mg L <sup>-1</sup> |                           |                        |
|                      | 1                       | 0.01 mg L <sup>-1</sup>   | Quinete et al., 2011   |
|                      | 0.05 ng/g <sup>-1</sup> | 0.001 ng/g <sup>-1</sup>  | Rissato et al., 2006   |
|                      | 0.9 µg kg <sup>-1</sup> | 0.18 µg kg <sup>-1</sup>  | Soares et al., 2015    |
|                      | 0.1 µg/L                | 3. Ruído                  | Rissato et al., 2004   |

|                  |                                                    |                                                     |                                              |
|------------------|----------------------------------------------------|-----------------------------------------------------|----------------------------------------------|
| Endrin           | 2.57 mg L <sup>-1</sup><br>0.05 ng/g <sup>-1</sup> | 0.02 mg L <sup>-1</sup><br>0.002 ng/g <sup>-1</sup> | Quinete et al., 2011<br>Rissato et al., 2006 |
| Mirex            | 0.10 ng/g <sup>-1</sup>                            | 0.003 ng/g <sup>-1</sup>                            | Rissato et al., 2006                         |
| Tetradifon       | NA                                                 | <0,01 mg / kg para<br>DPI                           | Rissato et al., 2005                         |
| Buprofezin       | NA                                                 | <0,01 mg / kg para<br>DPI                           | Rissato et al., 2005                         |
| Chlorpyrifos     | Na                                                 | <0,01 mg / kg para<br>DPI                           | Rissato et al., 2005                         |
| Diazinon         | NA                                                 | <0,01 mg / kg para<br>DPI                           | Rissato et al., 2005                         |
| Dichlorvos       | NA                                                 | <0,01 mg / kg para<br>DPI                           | Rissato et al., 2005                         |
| Dimethoate       | NA                                                 | <0,01 mg / kg para<br>DPI                           | Rissato et al., 2005                         |
| Methyl paration  | 0.6 µg kg <sup>-1</sup>                            | 0.18 µg kg <sup>-1</sup>                            | Soares et al., 2015                          |
| Cyfluthrin       | NA                                                 | <0,01 mg / kg para<br>DPI                           | Rissato et al., 2005                         |
| Cypermethrina    | Na                                                 | <0,01 mg / kg para<br>DPI                           | Rissato et al., 2005                         |
| Fenvalerate      | Na                                                 | <0,01 mg / kg para<br>DPI                           | Rissato et al., 2005                         |
| λ-Cyhalothrin    | NA                                                 | NA                                                  | Pinheiro, Moraes e Silva,<br>2011            |
| Fipronil         | 10.2 µg kg <sup>-1</sup>                           | 3.1 µg kg <sup>-1</sup>                             | Toffoli et al., 2015                         |
| Fipronil sulfone | 10.8 µg kg <sup>-1</sup>                           | 3.3 µg kg <sup>-1</sup>                             | Toffoli et al., 2015                         |
| Fipronil Sulfide | 4.5 µg kg <sup>-1</sup>                            | 1.5 µg kg <sup>-1</sup>                             | Toffoli et al., 2015                         |

|                     |                                                         |                                                                             |        |                                                                                                                     |
|---------------------|---------------------------------------------------------|-----------------------------------------------------------------------------|--------|---------------------------------------------------------------------------------------------------------------------|
| Fipronil Desulfinyl | 6.5 µg kg                                               | 2.0 µg kg                                                                   |        | Toffoli et al., 2015                                                                                                |
| 2,4,6-TCF           | NA                                                      | 0.01µg / kg                                                                 |        | Asmus et al., 2008                                                                                                  |
| 2,4,5-TCF           | NA                                                      | 0.01µg / kg                                                                 |        | Asmus et al., 2008                                                                                                  |
| HCH                 | NA<br>NA<br>1.2 µg kg-                                  | 0.01µg / kg<br>NA<br>0.37 µg kg-                                            |        | Asmus et al., 2008<br>Brilhante e Franco , 2006<br>Soares et al., 2015                                              |
| Alpha HCH           | NA<br>NA<br>0.9 mg L -1<br>0.03 ng/g -<br>1<br>0.1 µg/L | 0.01µg / kg<br>Não apresentado<br>0.01 mg L -1<br>0.002 ng/g -1<br>3. Ruído | GC/ECD | Asmus et al., 2008<br>Oliveira et al., 1995<br>Quinete et al., 2011<br>Rissato et al., 2006<br>Rissato et al., 2004 |
| Beta HCH            | NA<br>NA<br>0.9 mg L -1<br>0.05 ng/g -<br>1             | 0.01µg / kg<br>NA<br>0.01 mg L -1<br>0.002 ng/g -1                          |        | Asmus et al., 2008<br>Oliveira et al., 1995<br>Quinete et al., 2011<br>Rissato et al., 2006                         |
| Gama HCH            | NA<br>NA<br>0.05 ng/g -<br>1                            | 0.01µg / kg<br>NA<br>0.002 ng/g -1                                          |        | Asmus et al., 2008<br>Oliveira et al., 1995<br>Rissato et al., 2006                                                 |
| Delta HCH           | NA<br>NA<br>0.9 mg L -1<br>0.05 ng/g -<br>1             | 0.01µg / kg<br>NA<br>0.01 mg L -1<br>0.002 ng/g -1                          |        | Asmus et al., 2008<br>Oliveira et al., 1995<br>Quinete et al., 2011<br>Rissato et al., 2006                         |
| Imazalil            | NA                                                      | <0,01 mg / kg para<br>DPI                                                   |        | Rissato et al., 2005                                                                                                |

|                |          |                           |                                   |
|----------------|----------|---------------------------|-----------------------------------|
| Chlorothalonil | NA       | <0,01 mg / kg para<br>DPI | Rissato et al., 2005              |
| HCB            | NA       | <0,01 mg / kg para<br>DPI | Rissato et al., 2005              |
| Dicloran       | NA       | <0,01 mg / kg para<br>DPI | Rissato et al., 2005              |
| Etaconazole    | NA       | <0,01 mg / kg para<br>DPI | Rissato et al., 2005              |
| Hexaconazole   | NA       | <0,01 mg / kg para<br>DPI | Rissato et al., 2005              |
| Propiconazole  | NA       | <0,01 mg / kg para<br>DPI | Rissato et al., 2005              |
| tebuconazole   | NA       | <0,01 mg / kg para<br>DPI | Rissato et al., 2005              |
|                | NA       | NA                        | Pinheiro, Moraes e Silva,<br>2011 |
| Triadimefon    | NA       | <0,01 mg / kg para<br>DPI | Rissato et al., 2005              |
| Triadimenol    | NA       | <0,01 mg / kg para<br>DPI | Rissato et al., 2005              |
| Metconazole    | NA       | NA                        | Pinheiro, Moraes e Silva,<br>2011 |
| Prochloraz     | NA       | <0,01 mg / kg para<br>DPI | Rissato et al., 2005              |
| Vinclozolin    | NA       | <0,01 mg / kg para<br>DPI | Rissato et al., 2005              |
| Azoxystrobin   | NA       | NA                        | Pinheiro, Moraes e Silva,<br>2011 |
| Metaxyl        | NA       | NA                        | Pinheiro, Moraes e Silva,<br>2011 |
| Sulfluramida   | 10.Ruído | 3.Ruído                   | Nascimento et al., 2018           |

|                |    |                           |                      |
|----------------|----|---------------------------|----------------------|
| Bromopropylate | NA | <0,01 mg / kg para<br>DPI | Rissato et al., 2005 |
| Dicofol        | NA | <0,01 mg / kg para<br>DPI | Rissato et al., 2005 |

**Table A2.** Supplementary Material Minimum and maximum concentrations per pesticide and reference values for soil used for the calculation of the risk quotient (mg / kg)

| Pesticide   | Concentration |            | Country<br>RGv's | Agricultural<br>values | Residential<br>values | RQ<br>agricultural | RQ<br>residential |
|-------------|---------------|------------|------------------|------------------------|-----------------------|--------------------|-------------------|
|             | Minimum       | Maximum    |                  |                        |                       |                    |                   |
| Metolachlor | 0,20600       | 0,29100    | E.U.A            | 3,18                   | 4,35                  | 0,08604            | 0,00170           |
| Metolachlor | 0,01000       | 0,01740    |                  |                        |                       |                    |                   |
| 4,4' - DDT  | 0,00007       | 0,00064    | Brazil Conama    | 0,55                   | 2,00                  | 0,00104            | 621,83936         |
| 4,4' - DDT  | 0,00128       | 1243,68000 |                  |                        |                       |                    |                   |
| 4.4' DDE    | 0,00021       | 0,00526    | Brazil Conama    | 0,33                   | 1,00                  | 0,01530            | 333,52998         |
| 4.4' DDE    | 0,00002       | 333,53000  |                  |                        |                       |                    |                   |
| 4,4' - DDD  | 0,00007       | 0,00048    | Brazil Conama    | 0,30                   | 1,00                  | 0,00137            | 75,77980          |
| 4,4' - DDD  | 0,00020       | 75,78000   |                  |                        |                       |                    |                   |
| Heptachlor  | 0,00035       | 0,00057    | E.U.A            | 1,90                   | 2,90                  | 0,00012            | 0,00028           |
| Heptachlor  | 0,00200       | 0,00280    |                  |                        |                       |                    |                   |
| Endosulfan  | 0,00071       | 0,18900    | Brazil cetesb    | 4,70                   | 12,00                 | 0,04006            | 0,00017           |
| Endosulfan  | 0,00300       | 0,00500    |                  |                        |                       |                    |                   |
| Aldrin      | 0,00008       | 0,03800    | Brazil Conama    | 0,01                   | 0,03                  | 3,79200            | 0,10000           |
| Aldrin      | 0,00100       | 0,00400    |                  |                        |                       |                    |                   |
| Dieldrin    | 0,00070       | 0,00098    | Brazil Conama    | 0,20                   | 0,60                  | 0,00140            | 0,00103           |
| Dieldrin    | -             | 0,00062    |                  |                        |                       |                    |                   |
| Endrin      | 0,00008       | 0,00011    | Brazil Conama    | 0,40                   | 1,50                  | 0,00008            | 0,00125           |
| Endrin      | -             | 0,00187    |                  |                        |                       |                    |                   |
| Alpha HCH   | 0,00026       | 0,00074    | Brazil cetesb    | 0,00                   | 0,02                  | 0,24000            | 10,84000          |
| Alpha HCH   | 0,00720       | 0,22400    |                  |                        |                       |                    |                   |
| Beta HCH    | 0,00015       | -          | Brazil Conama    | 0,03                   | 0,10                  | 1,58900            | 0,00500           |
| Beta HCH    | 0,00110       | 0,16000    |                  |                        |                       |                    |                   |
| Gama HCH    | 0,00007       | -          | Brazil Conama    | 0,02                   | 0,07                  | 0,00350            | 0,84286           |
| Gama HCH    | 0,00100       | 0,06000    |                  |                        |                       |                    |                   |

Reference values taken from Li and Jennings, 2017, Li, 2018, CONAMA Resolution 420/2008 and CETESB, 2014
